# Supplementary material for: The Preference and Actual Use of Different Types of Rural Recreation Areas by Urban Dwellers—The Hamburg Case Study
Source: PLOS journal article supplement (doi:10.1371/journal.pone.0108638), 2014-10-14
Supplement: S1 (10.1371/journal.pone.0108638.s001) [file journal.pone.0108638.s001]

|              |       |           |
|--------------|-------|-----------|
| Interviewer: | Date: | Location: |
|--------------|-------|-----------|

[illegible]

**3)** The [Lüneburg Heath/...] is most important for you.

**a)** How do you assess the following 7 aspects for [the Lüneburger Heath/...]? The assessment is not about right or wrong, but we are interested in your personal opinion. (show 4. answer card)

**b)** Which is for you, independently of [the Lüneburg Heath/...] the most important criterion of a recreation area?

|                                                | a)                |           |                     |          |               |         | b) |
|------------------------------------------------|-------------------|-----------|---------------------|----------|---------------|---------|----|
|                                                | 5<br>very<br>high | 4<br>high | 3<br>neither<br>nor | 2<br>low | 1<br>very low | no idea |    |
| How do you assess...                           |                   |           |                     |          |               |         |    |
| ... the diversity [of the Lüneburg Heath/...]? |                   |           |                     |          |               |         |    |
| ... the uniqueness?                            |                   |           |                     |          |               |         |    |
| ... the naturalness?                           |                   |           |                     |          |               |         |    |
| ... the place attachment?                      |                   |           |                     |          |               |         |    |
| ... the accessibility?                         |                   |           |                     |          |               |         |    |
| ... the food services?                         |                   |           |                     |          |               |         |    |
| ... the information services?                  |                   |           |                     |          |               |         |    |

**4)** We have some more questions for our statistical analysis:

**a)** What is the postcode of your place of residence? \_\_\_\_\_

**b)** How old are you? \_\_\_\_\_

**c)** Gender      male:       female:

**d)** What is your highest educational qualification?

|                    |                                    |                              |                             |
|--------------------|------------------------------------|------------------------------|-----------------------------|
| University degree: | University entrance qualification: | middle school qualification: | basic school qualification: |
|--------------------|------------------------------------|------------------------------|-----------------------------|
